1 **DNA motifs are not general predictors of recombination in two *Drosophila* sister species.**

2

3

4

James M. Howie<sup>a+</sup>,

5

Rupert Mazzucco<sup>a+</sup>,

6

Thomas Taus<sup>a,b+</sup>,

7

Viola Nolte<sup>a</sup>,

8

Christian Schlötterer\*<sup>a</sup>.

9

10 <sup>a</sup> *Institut für Populationsgenetik, Vetmeduni Vienna, Veterinärplatz 1, 1210 Vienna, Austria*

11 <sup>b</sup> *Vienna Graduate School of Population Genetics, Vetmeduni Vienna, Veterinärplatz 1, 1210*

12

*Vienna, Austria*

13

14

<sup>+</sup> Equal first author.

15

16

17

\*Author for Correspondence: Christian Schlötterer, Institut für Populationsgenetik,

18

Vetmeduni Vienna, Veterinärplatz 1, 1210 Vienna, Austria; Fax: +43 1 25077-4390, Phone:

19

+43 1 25077-4300, Email: christian.schloetterer@vetmeduni.ac.at

20

21

Article type: Research Article

22

23

Data Deposition: Accession numbers to European Nucleotide Association and Dryad

24

provided upon acceptance of the article.

25

26 ABSTRACT

27

28 Meiotic recombination is crucial for chromosomal segregation, and facilitates the spread of  
29 beneficial and removal of deleterious mutations. Recombination rates frequently vary along  
30 chromosomes and *Drosophila melanogaster* exhibits a remarkable pattern. Recombination  
31 rates gradually decrease towards centromeres and telomeres, with dramatic impact on levels  
32 of variation in natural populations. Two close sister species, *D. simulans* and *D. mauritiana*  
33 do not only have higher recombination rates, but also exhibit a much more homogeneous  
34 recombination rate that only drops sharply close to centromeres and telomeres. Because  
35 certain sequence motifs are associated with recombination rate variation in *D. melanogaster*,  
36 we tested whether the difference in recombination landscape between *D. melanogaster* and  
37 *D. simulans* can be explained by the genomic distribution of recombination-rate associated  
38 sequence motifs. We constructed the first high resolution recombination map for *D. simulans*,  
39 and searched for motifs linked with high recombination in both sister species. We identified  
40 five consensus motifs, present in either species. While the association between motif density  
41 and recombination is strong and positive in *D. melanogaster*, the results are equivocal in  
42 *D. simulans*. Despite the strong association in *D. melanogaster*, we do not find a decreasing  
43 density of these repeat motifs towards centromeres and telomeres. We conclude that the  
44 density of recombination-associated repeat motifs cannot explain the large-scale  
45 recombination landscape in *D. melanogaster*, nor the differences to *D. simulans*. The strong  
46 association seen for the sequence motifs in *D. melanogaster* likely reflects their impact  
47 influencing local differences in recombination rates along the genome.

48

49 *Keywords:* *D. simulans*, Genomic Correlation, Linkage Disequilibrium, Motif Density, Motif  
50 Model, Recombination Map

## 51 INTRODUCTION

52

53 Meiotic recombination rate variation impacts on multiple important biological processes in  
54 sexual eukaryotes. It is crucial for chromosomal segregation (John 2005; Roeder 1997), but is  
55 also itself a powerful factor influencing genome organisation and sequence variability  
56 (Aquadro, et al. 1994; True, et al. 1996). Meiotic recombination arises when a double-  
57 stranded break leads to crossing over between homologous chromatids (Bergerat, et al. 1997;  
58 Hughes, et al. 2018; Keeney, et al. 1997; Schwacha and Kleckner 1995; Szostak, et al. 1983).  
59 Higher rates of recombination break up genetic linkage and can increase the efficacy of  
60 natural selection (Charlesworth and Charlesworth 2010; Haddrill, et al. 2007) and so affect  
61 the evolution of numerous genomic features. The reduction of transposable element density  
62 (Charlesworth and Lapid 1992; Charlesworth, et al. 1994; Kofler, et al. 2012; Petrov, et al.  
63 2011; Rizzon, et al. 2002) and the increased levels of DNA polymorphism (Aquadro, et al.  
64 1994; Begun and Aquadro 1992; Begun, et al. 2007; Kulathinal, et al. 2008) in regions of  
65 high recombination are probably the clearest examples.

66

67 Yet while the eukaryotic meiotic machinery is generally highly conserved (Keeney  
68 2001), rates of recombination have been observed to vary dramatically across species and  
69 populations, between individuals, and across sexes (Stapley, et al. 2017), apparently due to a  
70 combination of interacting environmental, epigenetic, and genetic factors (Detlefsen and  
71 Roberts 1921; Neel 1941; Parsons 1958; Stapley, et al. 2017; Stern 1926). Moreover, the  
72 distribution of meiotic recombination rates among and along chromosomes varies markedly  
73 across taxa (Choi and Henderson 2015; Hey 2004; Hunter, et al. 2016a; Lichten and Goldman  
74 1995; Petes 2001; Stapley, et al. 2017). Large-scale recombination suppression is often  
75 observed towards centromeres, the so called “centromere effect” (Beadle 1932; Choulet, et al.

76 2014; Hughes, et al. 2018; Szauter 1984). Depending on the species, either suppression or  
77 enhancement of recombination has been observed towards the telomeres (Broman, et al. 1998;  
78 Chan, et al. 2012; Comeron, et al. 2012; Myers, et al. 2005). Heterochromatin, which is often  
79 associated with these regions, tends also to exhibit lower recombination rates than  
80 euchromatin (Baker 1958; Roberts 1965; Sturtevant and Beadle 1936; Szauter 1984;  
81 Termolino, et al. 2016). Yet, in addition to these large-scale features of recombination  
82 landscapes, fast-evolving (Jeffreys, et al. 2001) finer-scale variation can also be observed  
83 (Comeron, et al. 2012; Myers, et al. 2005).

84

85         It has been proposed that short sequence motifs are a key factor shaping the  
86 recombination landscape. For example, in humans a 13-mer, CCNCCNTNNCCNC motif is  
87 targeted by the PRDM9 protein (Billings, et al. 2013; Grey, et al. 2011; Myers, et al. 2010),  
88 via its zinc-finger array (Baudat, et al. 2010; Parvanov, et al. 2010), where it promotes histone  
89 methylation and meiotic crossover, reorganising the nucleosome around it and driving double  
90 stranded break formation (Baker, et al. 2014; Brick, et al. 2012; Mihola, et al. 2009; Pratto, et  
91 al. 2014). These highly localized recombination events in 500–2000bp sections of  
92 chromosome have been called recombination “hotspots” (Lam and Keeney 2014). They are  
93 observed in a multitude of species including yeast, mice, humans among many others (Lam  
94 and Keeney 2014).

95

96         Hotspots are, however, no universal feature of recombination landscapes, and are not  
97 observed in a range of species groups including *Caenorhabditis elegans* and *Drosophila*  
98 (Aquadro, et al. 2001; Chan, et al. 2012; Hey 2004; Manzano-Winkler, et al. 2013; Miller, et  
99 al. 2016; Nachman 2002; Smukowski Heil, et al. 2015). *Drosophila spp.*, exhibit a large  
100 heterogeneity in recombination across their chromosomes, as demonstrated in *D. persimilis*

101 (Stevison and Noor 2010), *D. pseudoobscura* (Cirulli, et al. 2007; Kulathinal, et al. 2008), and  
102 *D. melanogaster* (Adrian, et al. 2016; Comeron, et al. 2012; Singh, et al. 2009). Still,  
103 *D. melanogaster* exhibits only a handful of mild “hotspots” relative to the ~30,000, often very  
104 strong hotspots observed in humans (International HapMap Consortium 2007). Instead the  
105 *D. melanogaster* recombination landscape is characterised by recombination “peaks” and  
106 “valleys” on a 5kb – 500kb scale (Adrian, et al. 2016; Chan, et al. 2012; Comeron, et al.  
107 2012; Singh, et al. 2009) with which short “recombination motifs” are associated; as is also  
108 seen in *D. pseudoobscura*, *D. persimilis*, and other species (Adrian, et al. 2016; Chan, et al.  
109 2012; Cirulli, et al. 2007; Comeron, et al. 2012; Heil and Noor 2012; Kulathinal, et al. 2008;  
110 Miller, et al. 2012; Singh, et al. 2009; Singh, et al. 2013; Stevison and Noor 2010). These  
111 motifs, which often reside in transcription-associated euchromatic regions (Comeron, et al.  
112 2012; Petes 2001), are thought to increase the accessibility of DNA chromatin to double-  
113 stranded cleavage (Comeron, et al. 2012) and de-stabilize DNA sequences, potentially in a  
114 stress, environmental or epigenetically dependent manner (Hunter, et al. 2016b; Kohl and  
115 Singh 2018; Neel 1941; Petes 2001; Redfield 1966; Stern 1926).

116

117 *D. melanogaster*, *D. simulans*, and *D. mauritiana* are sister species which are  
118 ecologically and karyotypically similar (LEMEUNIER AND ASHBURNER 1976; TRUE *et al.*  
119 1996), but differ dramatically in their recombination landscapes. While *D. melanogaster*  
120 exhibits a characteristic gradual decrease in recombination rate towards centromeres and to a  
121 lesser extent also telomeres, the recombination landscape in *D. simulans* and *D. mauritiana* is  
122 much flatter with a rather constant recombination rate almost to the end of the chromosome  
123 arm, where it drops very quickly (True, et al. 1996). Furthermore, these two species also have  
124 a higher recombination rate than *D. melanogaster* (True, et al. 1996), which has been  
125 attributed, in *D. mauritiana*, to the MEI-218 protein which has highly diverged between

126 *D. melanogaster* and *D. mauritiana*, promoting recombination to a lesser extent in the former  
127 (Brand, et al. 2018).

128

129 Here, to test the hypothesis that differences in genome-wide motif distributions can  
130 explain the observed differences in recombination (Adrian, et al. 2016), we take a multi-step  
131 approach. First, we produce a high-resolution recombination map for *D. simulans*. Next, we  
132 run a motif discovery in each species and construct a consensus motif set. We confirm the  
133 clear differences in recombination landscapes between the two species, but find a similar set  
134 and distribution of recombination associated motifs in each. Our results suggest that  
135 recombination associated motifs cannot explain the large-scale differences in recombination  
136 landscapes between the two species but may have a significant impact on recombination on a  
137 local scale, in particular in *D. melanogaster*.

138

## 139 MATERIAL AND METHODS

140

### 141 Recombination Map

142

#### 143 *Recombination Map Production*

144

145 A total of 202 isofemale lines were established from a natural *D. simulans* population in  
146 Tallahassee, Florida, USA in 2010 (Barghi, et al. 2017). From each of the 189 lines that were  
147 still alive in 2016, an individual male was selected and crossed with a virgin “reference”  
148 female from the M252 strain that was used to produce the *D. simulans* reference genome  
149 (Palmieri, et al. 2015). Paired-end libraries were generated for a single F1 female as described  
150 in Barghi, et al. (2017) and sequenced on an Illumina HiSeq XTEN to obtain an average

151 sequence coverage of 30x. Single-nucleotide polymorphisms (SNPs) were called with  
152 FreeBayes (v1.1.0-46-g8d2b3a0, Garrison and Marth 2012), requiring a minimum sequencing  
153 coverage of 10x and a variant quality of at least 50. All SNPs that were polymorphic in the  
154 M252 reference strain were masked. Based on line-specific haplotype information, the  
155 genome-wide recombination map was estimated with LDJump (v0.1.4, Hermann, et al. 2018),  
156 specifying a segment size of 1kb, with an  $\alpha = 0.05$  and an  $\Theta = 0.04$ . We disabled LDJump's  
157 segmentation analysis and worked with raw recombination rate estimates. Recombination  
158 rates were converted from  $\rho$  to units of cM/Mb by normalising them so as to have a genetic  
159 map length between a set of marker genes equivalent to that which has been previously  
160 reported (True, et al. 1996).

161

162 The resultant *D. simulans* recombination map was used in parallel with the  
163 *D. melanogaster* recombination map produced by Comeron, et al. (2012), downloaded from  
164 the *Drosophila melanogaster* Recombination Rate Calculator (Fiston-Lavier, et al. 2010).

165

### 166 *Recombination Map Scaling*

167

168 As the raw recombination map output by LDJump is noisy, we smoothed each recombination  
169 map at several scales. In *D. melanogaster*, the raw map (Comeron, et al. 2012) contained  
170 information on recombination rate at a 100kb resolution, in *D. simulans* raw information was  
171 generated at a 1kb scale. For smoothing, we used a moving median approach, using window  
172 sizes of 5, 25, 101, 501 and 2501 kb for *D. simulans*, and a 101, 501, 2501 kb for  
173 *D. melanogaster*, respectively. Advantages of the moving median as a smoothing method  
174 include low sensitivity to outliers, and a direct relationship to underlying data, in the sense that  
175 only values present in the raw data set can be present in the smoothed set if the median is

176 taken based on an odd number of input values, which in our case it always was. Because this  
177 approach is also computationally expensive, and prone to deleting map features when there  
178 are long runs of identical values, we investigated as an alternative approach, smoothing via  
179 LOESS local regression (Cleveland, et al. 1992), which produces qualitatively equivalent  
180 results (Figure S2). The smoothing scales chosen reflect those in Adrian, et al. (2016),  
181 relevant to potential motif explanatory power. The “correct” scale on which motifs may  
182 function is *a priori* unclear.

183

## 184 **DNA Motif Identification**

185

### 186 *Motif Discovery*

187

188 For each species, we ran a genome-wide motif discovery using MEME (Bailey and Elkan  
189 1994), from the MEME suite of motif-based sequence analysis tools (Bailey, et al. 2009,  
190 version 5.0.1pl, accessible at <http://meme-suite.org>; Bailey, et al. 2015), a software designed  
191 to detect DNA sequence motifs in genetic data. After dividing each of the five large  
192 chromosomes (X, 2L, 2R, 3L, 3R) into high- and low-recombining regions based on the  
193 chromosome median recombination rate, we used this software in the “differential  
194 enrichment” mode to detect motifs enriched in high-recombining areas of the genome. For  
195 *D. melanogaster*, we ran MEME on the release 5 reference genome (v. 5.36), for concordance  
196 with our recombination information from Comeron et al. (2012). For *D. simulans*, we used  
197 the M252 Madagascar reference genome (Palmieri, et al. 2015), to align with our  
198 recombination map. Motif discovery searches were run with species specific Markov  
199 Background Models, simple matrices of background base frequencies obtained using the  
200 MEME *fasta-get-model* command, for each reference genome in turn. The full procedure was



201 repeated with all smoothed maps (Methods: *Recombination Map Production*). For  
202 completeness, a raw 1 kb window motif discovery run was also conducted for *D. simulans*. A  
203 similar search for motifs associated with lower recombination areas returned no results.  
204  
205 *Motif Consensus Set*  
206  
207 MEME motif discovery runs returned a set of 5, 4 and 3 motifs in *D. melanogaster* and 1, 2,  
208 4, 1, 1 and 1 significant motifs in *D. simulans*, at the 101, 501, and 2501, and 1, 5, 25, 101,  
209 501, and 2501 kb scales, respectively (SI.3,  $E \leq 0.01$ ). It was noticed that, while individually  
210 distinct, numerous motifs contained similar core patterns whilst varying, for example, only in  
211 repeat number. As such, we constructed a set of 5 consensus motifs that captured the core  
212 variation in all motifs significantly associated with increased recombination, across both  
213 species, and over all scales. This core set of motifs C1–5, was determined via a two-step  
214 method. First, we contrasted the motifs across each of our recombination map smoothing  
215 scales in both species, retaining only motifs that occurred in at least one scale with a  
216 minimum significance of  $E \leq 0.01$  in at least one species. Motifs were then simplified by  
217 allowing only the most likely base at each position, and motif lengths were fixed as the  
218 longest sequence length that could be represented in both species (as lengths were by  
219 tendency longer in *D. melanogaster*). This resulted in the following set of consensus motifs:  
220 C1=[A]<sub>1</sub>; C2=[GCA]<sub>1</sub>; C3=[CA]<sub>6</sub>; C4=[TA]<sub>5</sub>; C5=[G]<sub>8</sub>. We note that *D. melanogaster* made  
221 the dominant contribution to the consensus motifs, as the motifs in *D. simulans* were less  
222 significant than those observed in *D. melanogaster* (SI.3), and that the number of consensus  
223 motifs was informed by the data, and not decided *a priori*. As our consensus motifs turned out  
224 to be simplified versions of the most predictive motifs that were identified by Adrian et al.

225 (2016), we quantitatively confirmed this similarity using the MEME Suite tool TomTom  
226 (Gupta, et al. 2007), under default parameters (see SI.4).

227

## 228 **Genome-Wide Motif Densities**

229

### 230 *Motif Locations*

231

232 We converted the 5 consensus motifs into letter-probability matrices, to be used as input to  
233 FIMO, a MEME Suite tool designed to find genome-wide motif occurrences (Grant, et al.  
234 2011). Matrices were compiled in a hard, and a softer, version; with the expected base given a  
235 probability of 1 and unexpected bases probabilities of 0, or the expected base a probability of  
236 0.97, and unexpected bases a probability of 0.01. FIMO was then run for each species, taking  
237 the reference sequences and Markov Background Models as noted in Methods: *Motif*  
238 *Discovery*, and using parameter *max-stored-scores* = 50000000, and all others at default.  
239 Results of the hard and soft motif probability runs were qualitatively identical, so hard coded  
240 motif probabilities were used for follow-up analysis (soft runs not reported).

241

### 242 *Motif Densities*

243

244 FIMO output provides, per motif, the genomic locations (chromosome, start and stop  
245 position) at which a motif was found, as well as a *p*-value and a *q*-score (Benjamini and  
246 Hochberg 1995) per record, which show how well the motif was matched to the underlying  
247 reference sequence, both before and after correction for multiple testing (Benjamini and  
248 Hochberg 1995). To obtain genome-wide motif densities in each species, we calculated for  
249 each motif the sum of  $1 - q$ , across a sliding window of 1 kb, where *q* refers to the per record

250  $q$ -score, such that per window motif densities are discounted in relation to the quality of the  
251 motif match, with higher quality matches counting more. A total, genome-wide count (of  $1 -$   
252  $q$ ) of each motif was also obtained from the raw FIMO output.

253

## 254 **Motif - Recombination Correlations and Models**

255

### 256 *Motif Density – Recombination Rate Correlations*

257

258 To investigate the relationship between recombination rates and genome-wide abundances of  
259 individual motifs, we calculated the correlations between motif densities, binned at 1 kb, and  
260 corresponding recombination rates (cM/Mb), per motif, for *D. simulans* and *D. melanogaster*,  
261 respectively. As there was no clear *a priori* expectation for the genomic scale at which motifs  
262 would have most impact on recombination, the analysis was repeated for all smoothing scales  
263 noted in Methods: *Recombination Map Scaling* for *D. melanogaster* and *D. simulans* (and  
264 was repeated on the raw 1 kb scale in for *D. simulans*, not shown). Spearman's rho,  $\rho$ , was  
265 used as a non-parametric estimator of the correlation between the test variables, and both the  
266 direction and significance of all correlations were extracted. To investigate the overall  
267 predictive power of motif densities, irrespective of chromosomal background, the analysis  
268 was repeated on the total genomic data, pooling across all of the 5 major chromosomes, with  
269 the analysis repeated per motif and species.

270

271 Finally, to test for explicit directional effects of each consensus motif on  
272 recombination, a linear regression model was fitted, per motif, species, scale, and  
273 chromosome, for the effect of motif density on local recombination rate, and repeated for the  
274 genome average.

275

276 A schematic representation of this analytic pipeline is presented in Figure 1. All statistical

277 analyses were run in R, version 1.1383, using in house scripts (see SI.5).

278

279

280 **Figure 1.**

281

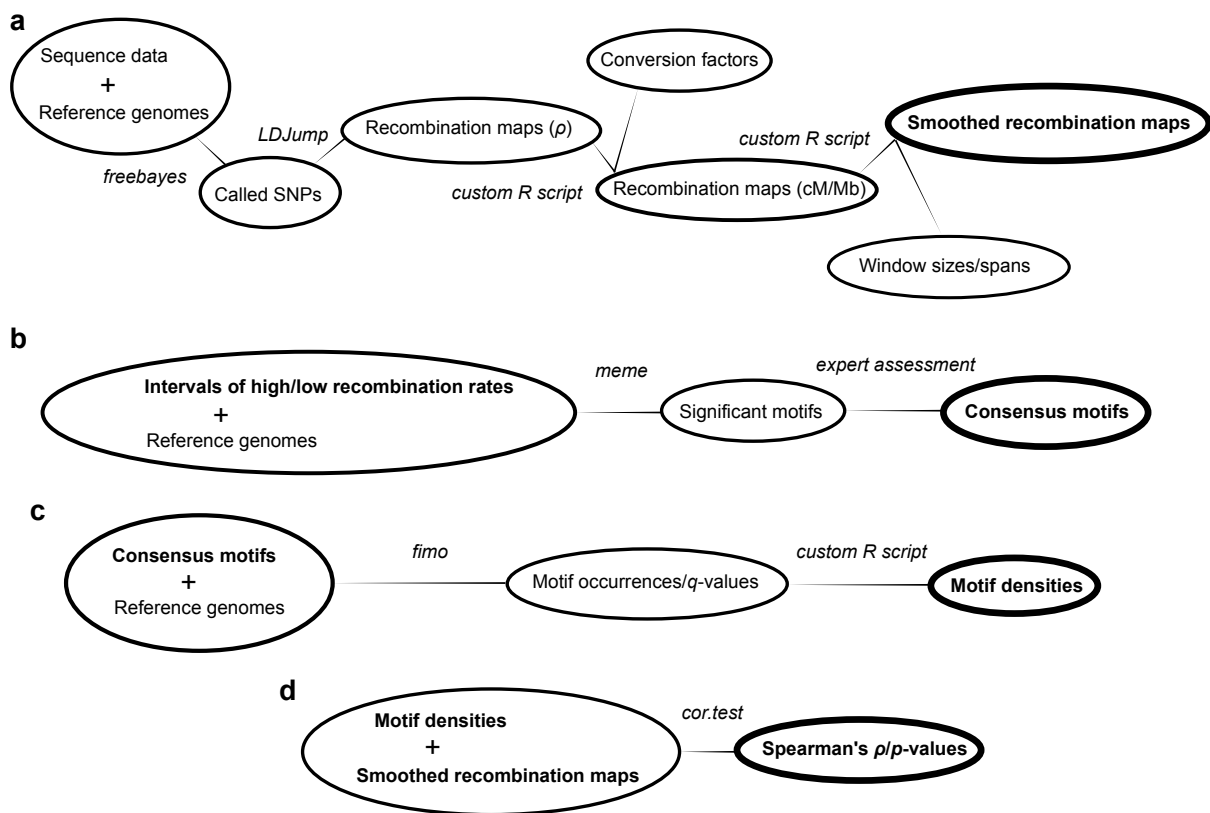

282

283

284

285

286 **Fig. 1.** A schematic representation of the bioinformatic pipeline used. Ovals represent

287 physical data sets, lines represent tools used to derive them; see the Methods for details.

288

289

## 290 **RESULTS**

291

### 292 **Recombination rates in *D. simulans* are more uniform across chromosomes, than in**

### 293 *D. melanogaster*

294 We present the first high-resolution recombination map for *Drosophila simulans*, and contrast  
295 it to that of *D. melanogaster* (Comeron, et al. 2012). Across a range of smoothing parameters,  
296 the *D. simulans* recombination map is more uniform than that of *D. melanogaster* (Figures 2,  
297 3). The level of recombination suppression is lower towards the centromere in *D. simulans*.

298 As in *D. melanogaster*, the main broad-scale features of the *D. simulans* map hold across the  
299 full range of genomic scales, while finer resolution peaks and troughs become visible only at  
300 higher resolutions, at the 5 – 501 kb scale (Figure 3). The finer scale peaks (on a kb scale), as  
301 with the broader features (on a Mb scale), differ between these two sister species, and persist  
302 across smoothing scales (Figures 2, 3).

303

### 304 **Motif density landscapes are similar in *D. simulans* and *D. melanogaster***

305 We identify 5 consensus motifs based on motifs recovered in each of the two species  
306 (Methods: *Motif Consensus Set*) and obtain their genome-wide densities. The consensus  
307 motifs were: C1=[A]<sub>n</sub>; C2=[GCA]<sub>s</sub>; C3=[CA]<sub>e</sub>; C4=[TA]<sub>s</sub>; C5=[G]<sub>s</sub>. Across all chromosomes  
308 and consensus motifs, motif density landscapes were similar in *D. melanogaster* and  
309 *D. simulans* (Figure 4). This was especially true for intermediate size landscape features, such  
310 as humps and wider valleys (e.g. motif C2 on X, 7.5 Mb position, or 2L at the 8 and 12 Mb  
311 positions, Figure 4). Therefore, motif density cannot explain the differences in the broad  
312 recombination landscape between both species.

313

314

315

316

317 **Figure 2.**

318

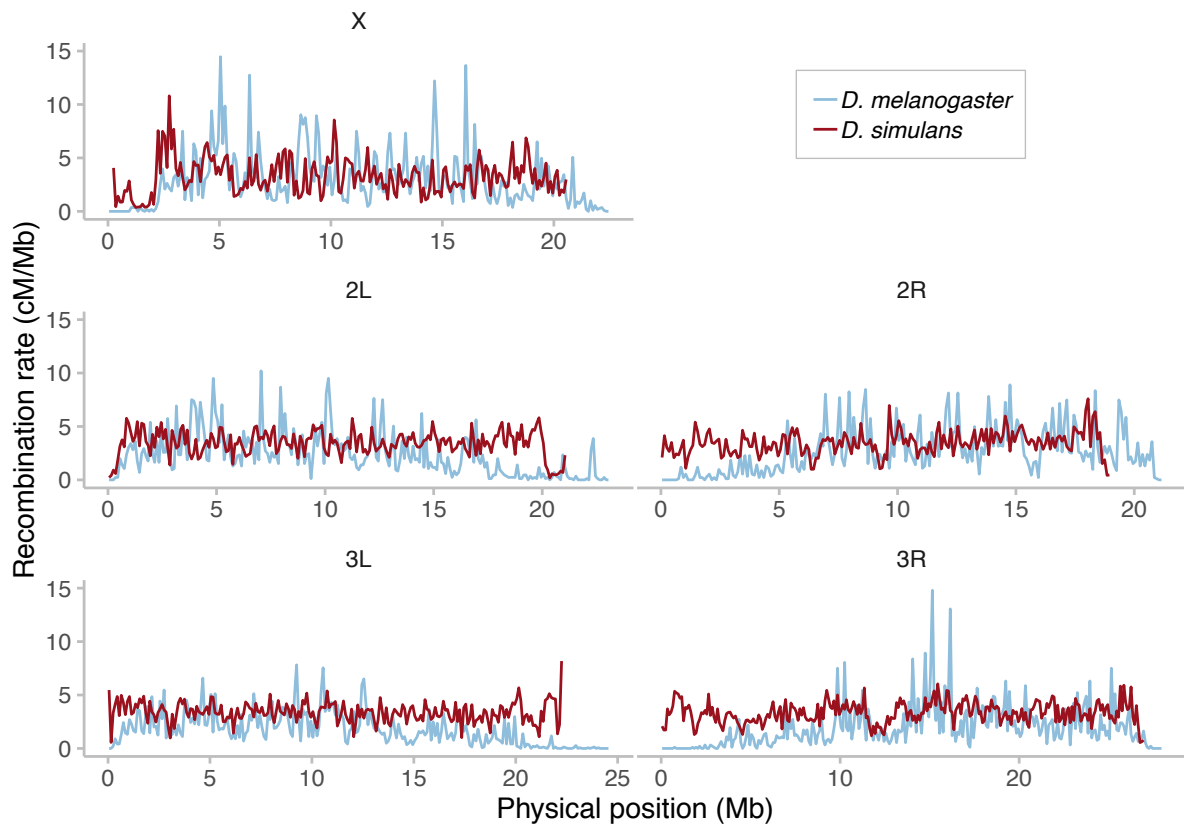

319

320

321

322 **Fig. 2.** Recombination rates in *D. simulans* are more uniform across chromosomes than in  
323 *D. melanogaster*. Red lines show the recombination rate in *D. simulans* for each of the major  
324 chromosomes (name labels in top margin), smoothed at a 101 kb window size with a moving  
325 median. For comparison, blue lines show the recombination rate in *D. melanogaster* (with  
326 data taken from Comeron *et al.* 2012); Figure 3 for other resolutions.

327

328

329

330

331 **Figure. 3**

332

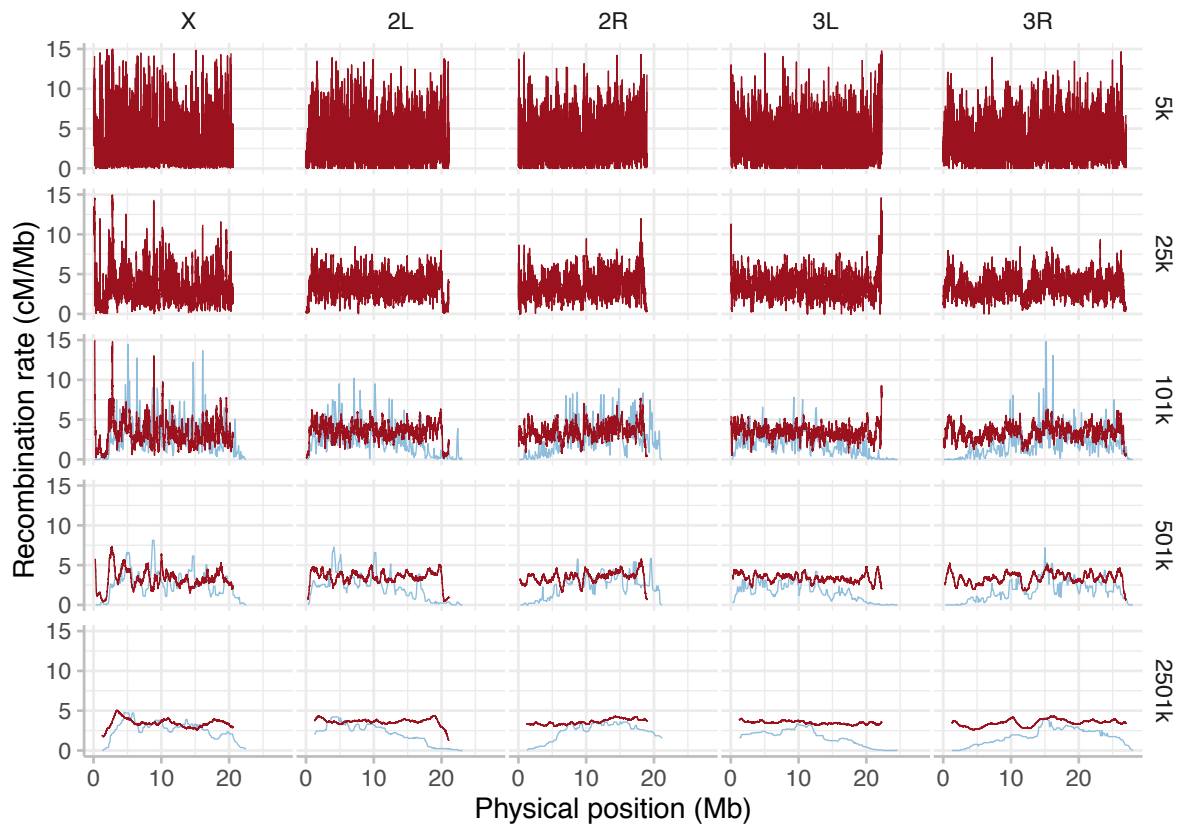

333

334

335

336 **Fig. 3.** Recombination rates in *D. simulans* are more uniform across chromosomes than in

337 *D. melanogaster*, at all smoothing scales. Red lines show the recombination rate in

338 *D. simulans* for each of the major chromosomes (names in top margin), smoothed at 5

339 window sizes (right margin, in bp) with a moving median. For comparison, blue lines show

340 the recombination rate in *D. melanogaster* (data taken from Comeron *et al.* 2012 at 101k; and

341 smoothed at 501k and 2501k; with data not available at smaller resolutions).

342

343

344

345 **Figure 4.**

346

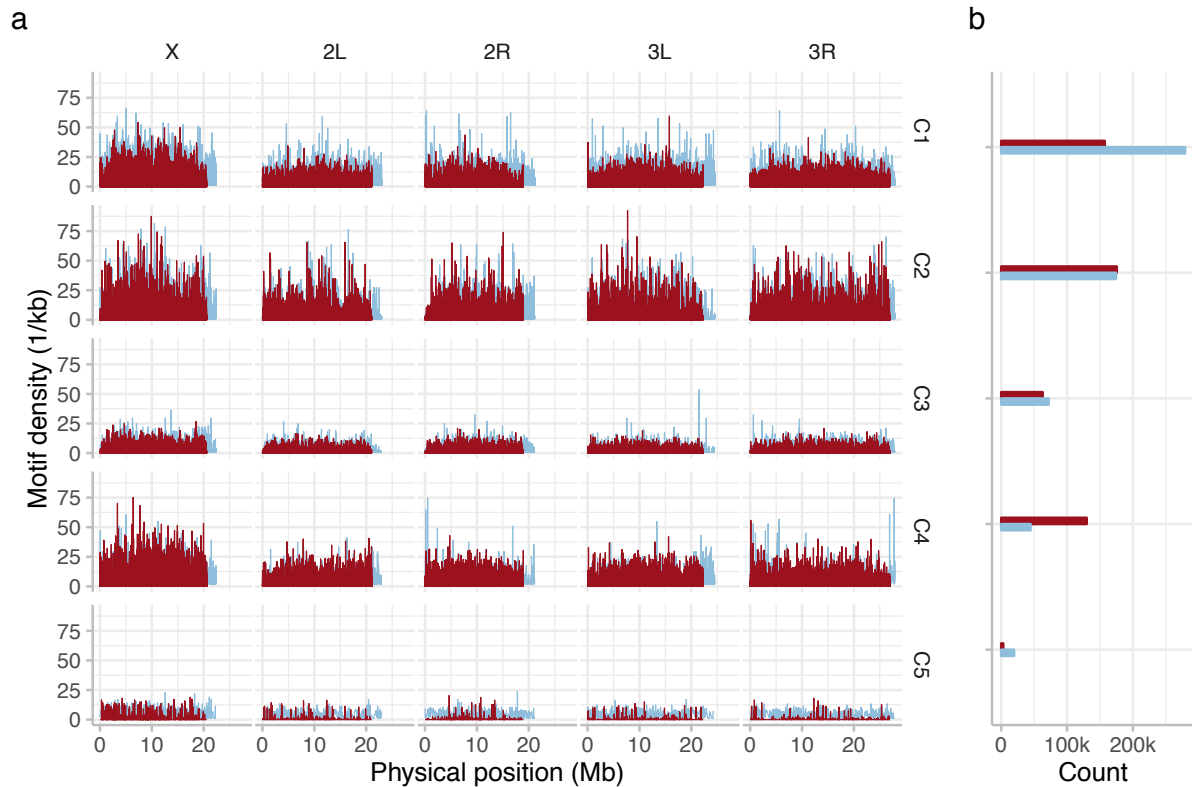

347

348

349

350 **Fig. 4.** Motif densities are similar in *D. simulans* and *D. melanogaster*. (a) Red (*D. simulans*)

351 and blue (*D. melanogaster*) lines show motif densities across major chromosomes (top

352 margin) as reported by FIMO, with motif occurrences discounted by  $1 - q$  (see main text)

353 and binned into 1kb windows for each consensus motif (C1-5). (b) Total motif counts across

354 all five large chromosomes. FIMO threshold:  $p$ -value of  $1e-4$  (default setting).

355

356

357



358 **Figure 5.**

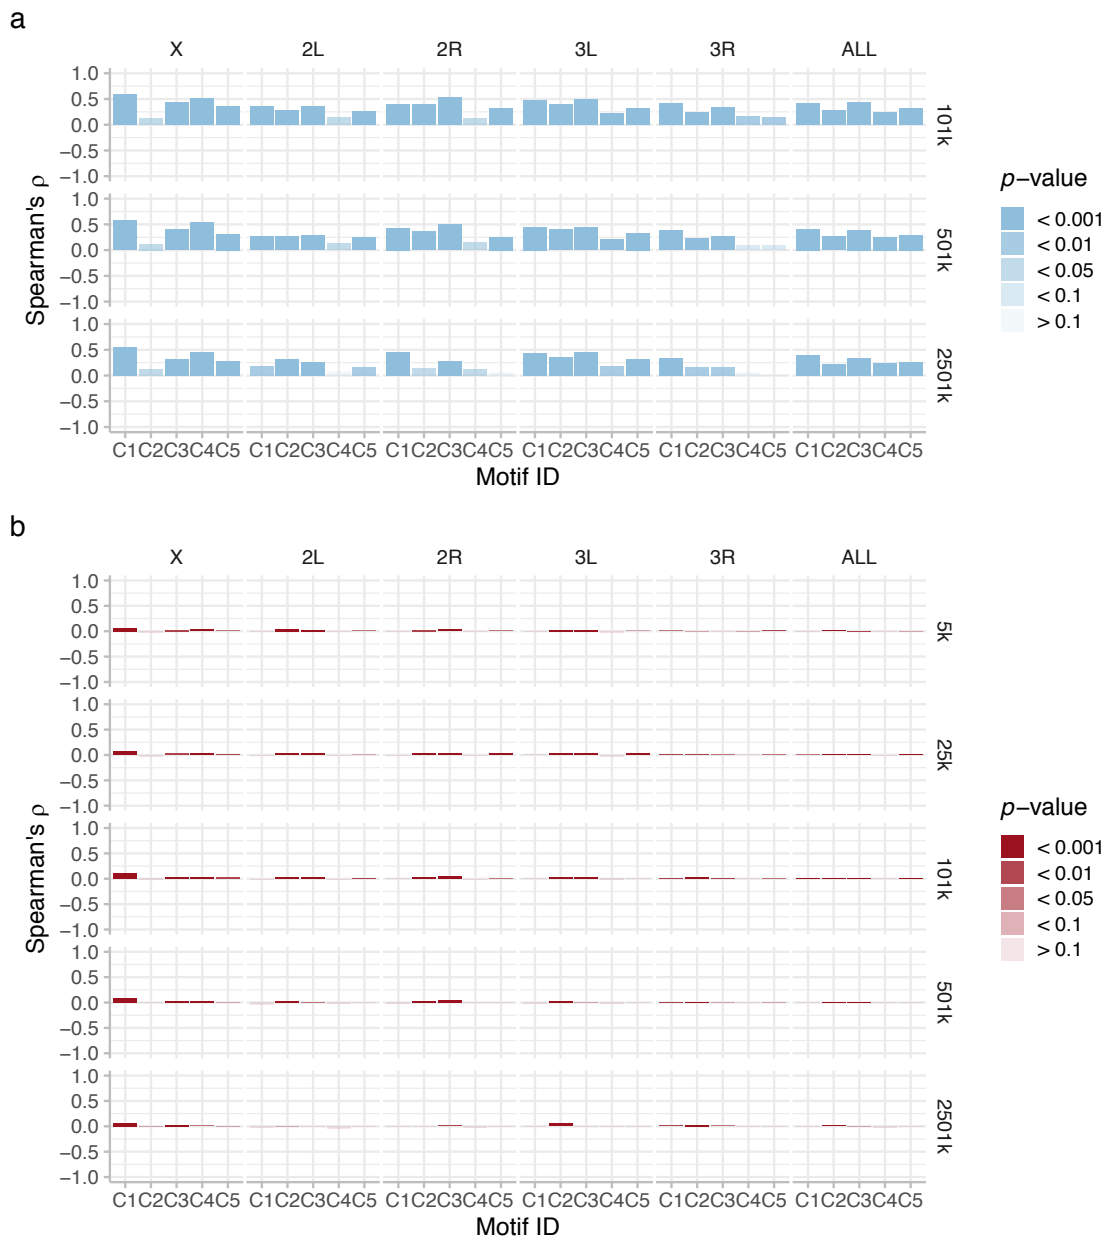

359

360 **Fig. 5.** Associations between motif densities and recombination rates are generally weaker

361 and less significant in *D. simulans* than in *D. melanogaster*. For (a) *D. melanogaster*, and (b)

362 *D. simulans*, bars indicate Spearman's rho,  $\rho$ , (height) and the corresponding p-value

363 (transparency), from tests of the correlation between motif densities (as shown in Figure. 4 for

364 *D. simulans*, but re-binned for *D. melanogaster* to account for the resolution of the available

365 data) and recombination rates, across individual chromosomes and for the five large

366 chromosomes together (top margin), at all smoothing levels (see right margin).

367           Finer resolution peaks and troughs varied more between species (e.g. motif C4 on X,  
368 5–15 Mb position, Figure 4). Further, although the different motifs, C1–5, displayed similar  
369 broad patterns in each species – per chromosome and genome-wide – some species-specific  
370 patterns were seen. Motifs C1, [A]<sub>11</sub> and C5, [G]<sub>8</sub> were far less common in *D. simulans*, which  
371 had a lower total motif count, while the opposite was true for motif C4, [TA]<sub>1</sub>. Nonetheless,  
372 genome-wide motif distributions were similar in each species.

373

374 **Associations between motif densities and recombination rates are generally weaker and**  
375 **less significant in *D. simulans* than in *D. melanogaster***

376 We examined correlations between motif densities and recombination rates in each species,  
377 both per chromosome, and genome-wide, and at a range of genomic scales. A clear difference  
378 was observed between the species. In *D. melanogaster*, all but one correlation was positive,  
379 most were highly significant both genome-wide and per chromosome, and the correlation  
380 coefficients (Spearman's  $\rho$ ) were generally large; with a range of  $\sim 0.4 - 0.6$  for the most  
381 associated motifs per chromosome (and genome-wide, Figure 5a). In contrast, the  
382 associations observed in *D. simulans* were heterogeneously positive or negative, had lower  
383 significances than those observed in *D. melanogaster*, and were in all cases weak; with a  
384 range of  $\sim 0.01 - 0.04$  for the most associated motifs per chromosome (and genome-wide,  
385 Figure 5b). In both species, there was also variation in the importance of different motifs on  
386 different chromosomes (below). However, while in *D. melanogaster* the patterns of motif  
387 association held across all scales for each chromosome and genome-wide, in *D. simulans*  
388 there were occasional exceptions to this rule. For instance, on 2L, 2R, 3L, and genome-wide,  
389 the positive correlations for C1 and C4 switched direction at scales larger than 25 – 101 kb.  
390 Given that these correlations were very weak with low significance, we attribute these  
391 discrepancies stochastic noise, rather than biological signals. We finally note that motifs C1,

392 C2, and C3 were the most associated with recombination across most major chromosomes in  
393 both species (though to a far lesser extent in *D. simulans*), but that an exception is observed  
394 for the X chromosome. Here, motif C2 had a very weak association with recombination rate  
395 in both species, and motif C4 instead had a high association, relative to its weak association  
396 on most autosomes in both species. Very similar observations were seen for the linear  
397 regressions (Figure S1), with more models being significant and positive for *D. melanogaster*.

398

## 399 **DISCUSSION**

400

401 We present the first high resolution recombination map for *Drosophila simulans*, and a  
402 comparative analysis of recombination motifs and their association with recombination in two  
403 sister species, *D. melanogaster* and *D. simulans*. We tested the hypothesis that such motifs  
404 predict recombination rates within the *D. melanogaster* species subgroup.

405

406 Our *D. simulans* recombination map confirms the results of previous, lower resolution  
407 work in this species (Ohnishi and Voelker 1981, 1979; Stuktevanat 1929; True, et al. 1996).  
408 We find that the *D. simulans* recombination landscape is far flatter than in *D. melanogaster*  
409 (Figures 2, 3). While centromeric recombination suppression on the X, and to some extent on  
410 2L and 3R, is observed in *D. simulans*, it is restricted to a small genomic region, whereas in  
411 *D. melanogaster* the recombination rate decreases only gradually over a much larger region in  
412 proximity to the centromeres (Comeron, et al. 2012). In *D. simulans*, a similarly sharp  
413 teleomeric suppression is also observed on 2L (and to some extent on X, 2R, 3L and 3R) at  
414 most smoothing scales (this pattern is less clear at 2501 kb). Unlike in *D. melanogaster*,  
415 overall recombination rates in *D. simulans* appear similar between X and the autosomes  
416 (Figures 2, 3) (Comeron, et al. 2012). We caution however, that recombination rate estimates

417 from population polymorphism data are sensitive to demographic events and particular the  
418 ratio of X-chromosomal and autosomal variation differs widely between populations (Kauer,  
419 et al. 2002; Schöfl and Schlötterer 2004). In *D. simulans* and *D. melanogaster*, mid-to-large  
420 scale recombination features clearly persist over the 101, 501 and 2501 kb smoothed maps. In  
421 *D. simulans*, our high-resolution map shows that such features also persist down to the 25 and  
422 5 kb scale (e.g. the dip on 3R at 12.5 Mb position, Figures 3). As with the centromeric  
423 differences however, mid-scale and narrower landscape features differ between the species,  
424 especially at the 101 and 501 kb resolutions. In short, at all genomic scales tested the two  
425 species differ dramatically in recombination rates, over broad- and finer-scale recombination  
426 features.

427

428         Direct implications from these differences in genetic maps are that linkage-  
429 disequilibrium should be both lower and less variable across the *D. simulans* chromosomes  
430 relative to those of *D. melanogaster*. It is important to keep in mind that the *D. simulans*  
431 reference genome includes less repetitive DNA at the centromeric and telomeric ends of the  
432 chromosomes, so a comparison of recombination rates is not possible at the extremes of these  
433 regions. Nonetheless, our results bolster the current understanding of *D. simulans*  
434 recombination as less heterogeneous than that of *D. melanogaster* (Comeron, et al. 2012;  
435 True, et al. 1996), and indicate that selection will be generally more efficient in *D. simulans*,  
436 as genes that are uncoupled by recombination selection may result in more distinct signals, in  
437 particular in Evolve and Resequence experiments (Barghi, et al. 2017; Kofler and Schlötterer  
438 2014; Tobler, et al. 2014). Hence, adaptive evolutionary changes may occur more rapidly in  
439 *D. simulans*, all else being equal, because Hill-Robertson effects are reduced by the higher  
440 recombination (Hill and Robertson 1966).

441

442           Turning to the causes of this recombination variation, we ran a MEME motif search to  
443 identify short DNA sequence motifs associated with regions of higher than average  
444 recombination, repeating this search in both *D. melanogaster*, and *D. simulans*. The first point  
445 of note was that a larger number of motifs were returned in *D. melanogaster*, and that those in  
446 *D. simulans* were by tendency both shorter and showed a less significant association with  
447 recombination rate, with lower quality matches. Nonetheless, a generally similar set of motifs  
448 was recovered in each species, and across each recombination map smoothing scale  
449 investigated. In short, we obtained a subset of the *D. melanogaster* motifs in *D. simulans*;  
450 motifs C1, C5 and by trend, motifs C2 and C4, providing some confidence in the impact of  
451 these motifs on the recombination rate. The motif sharing between the two *Drosophila*  
452 species provides some evidence that recombination motifs may to some degree be universal  
453 across *Drosophila* species. This idea builds upon prior work, which has shown that there is  
454 some overlap in motifs between more distant *Drosophila* species, such as *D. pseudoobscura*,  
455 which exhibits CACAC (Cirulli, et al. 2007), CCCCACCCC and CCTCCCT motifs  
456 (Kulathinal, et al. 2008), and *D. persimilis*, which exhibits a CCNCCNTNNCCNC motif  
457 (Stevison and Noor 2010). This led Comeron, et al. (2012) to speculate that *Drosophila* has a  
458 stable set of recombination motifs of universal function, which they confirmed in part by  
459 showing that *D. melanogaster* also exhibit the CACAC and CCTCCCT motifs, though not the  
460 CCCCACCCC motif. Our study builds on this result, showing that a larger degree of motif  
461 overlap can be seen both when contrasting consensus motifs and when comparing between  
462 more closely related species, and that the [CA]<sub>n</sub> motif is universal to all *Drosophila* species  
463 studied. However, it is immediately notable that no complex, multi-part motifs were  
464 recovered in our study.  
465

466           The genome-wide distribution of motifs (Figure 4) revealed, somewhat surprisingly,  
467 that there are also clear parallels between the two species motif landscapes. Not only do  
468 motifs with higher density in *D. melanogaster* generally have a higher density in *D. simulans*,  
469 but the patterns of motif distribution genome-wide are also remarkably similar. For instance, a  
470 similar “hump” and “peak” can be observed at the 8 and 9 Mb positions of chromosomes X  
471 and 2L respectively, for motif C2, in both species, while a density “trough” can be seen at 15  
472 Mb on chromosome 2L for this motif (Figure 4). Motifs C1, C3 and C4 likewise exhibit very  
473 limited differences between species, on all chromosomes (Figure 4), despite clear differences  
474 in recombination rates (Figure 3). A few differences do exist. Motif C1 is more common in  
475 *D. melanogaster*, even if the “landscape” is similar to *D. simulans*; Motif C5 is less common  
476 in *D. simulans*, and exhibits a distinct landscape on all autosomes; and, any narrow-scale  
477 features rarely overlap between species, mirroring patterns of distinct recombination peaks  
478 and similar landscapes seen in *D. melanogaster* populations (Chan, et al. 2012; Smukowski  
479 Heil, et al. 2015). Consequently, while it might be tempting to speculate that subtle  
480 differences in motif densities can explain the flatter recombination landscape of *D. simulans*  
481 and its unique recombination peak set, it is difficult to reconcile the distinctive patterns of  
482 recombination rate variation in the two species with their exceptionally similar motif density  
483 landscapes, that are almost identical between species, especially when focusing on the large-  
484 scale differences in centromeric and telomeric regions.

485

486           The similar motif density patterns between the two species cast doubt on the  
487 hypothesis that differences in motif distribution can account for differences in recombination  
488 variation in these species. If divergent motif densities really account for the species  
489 differences in recombination rates, how can we explain the lack of concordance between  
490 reduced recombination towards the centromeres in *D. melanogaster*, the lack of this reduction

491 in *D. simulans*, and the similar motif distributions over these regions in both species? To  
492 investigate this observation quantitatively, we calculated Spearman's  $\rho$  as an estimator of the  
493 correlation between genome-wide motif density and recombination rate (cM/Mb), for each  
494 motif, in each species, across a range of smoothing scales. This revealed a striking difference  
495 between the two species. In *D. melanogaster*, all associations (aside one) were positive, for all  
496 motifs at all scales tested, with low  $P$ -values observed in most cases (Figure 5). These results  
497 accord well with those of Adrian, et al. (2016), who found positive associations between  
498 motif densities and recombination rate in *D. melanogaster*, using a similar set of motifs. In  
499 contrast, the associations observed in *D. simulans* were far smaller, and far more  
500 heterogeneous across chromosomes and motifs (Figure 5). This observation was confirmed by  
501 our linear regression models, fitted to explicitly test the predictive power of each motif to  
502 explain recombination rate variation, which showed an almost identical pattern (Figure S1).  
503 The correlations and model fits were similar within each species across all smoothing scales,  
504 in that the level of correlation did not increase with higher or lower resolution recombination  
505 maps. The clear implication is that motif densities do not universally predict recombination  
506 rates across the *Drosophila* clade, and are in particular not responsible for the large-scale  
507 differences observed between our two species. It is therefore pertinent to ask what alternative  
508 mechanisms could explain such differences.

509

510 A strong candidate is the dicistronic meiosis gene *mei-217/mei-218* and its protein  
511 product, MEI-218 (Brand, et al. 2018), which is involved in the resolution of crossing over  
512 into double stranded breaks and recombination (Brand, et al. 2018). Divergent forms have  
513 recently been identified in *D. mauritiana* and *D. melanogaster*, species that diverged 0.6 – 0.9  
514 Ma. Like *D. simulans*, *D. mauritiana* exhibits a higher and flatter recombination rate  
515 landscape than *D. melanogaster* (True, et al. 1996), with the difference especially pronounced

516 in the centromeric and telomeric regions (True, et al. 1996), and with this pattern expressed to  
517 an even larger extent than is seen in *D. simulans* (True, et al. 1996). Intriguingly then, Brand,  
518 et al. (2018) also found a high divergence in DNA and protein structure in the *mei-217/mei-*  
519 *218* gene and MEI-218 protein between *D. mauritiana* and *D. melanogaster*. The  
520 *D. mauritiana* form was far more effective in promoting recombination, increasing  
521 recombination assurance and reducing crossover interference (Brand, et al. 2018). It explained  
522 a large portion of the variance in crossover rates between *D. mauritiana* and *D. melanogaster*,  
523 especially that in the centromeric and telomeric regions (Brand, et al. 2018), and so could be a  
524 primary mechanistic variant explaining the differences in recombination between *D. simulans*  
525 and *D. melanogaster*. The clear parallel differences between the recombination maps of  
526 *D. melanogaster* versus *D. mauritiana* and *D. melanogaster* versus *D. simulans* imply that  
527 *mei-217/mei-218* may be responsible for the heterogeneity in recombination landscape that  
528 we have observed.

529

530         What then might explain the clear correlations between motif density and  
531 recombination seen in *D. melanogaster*, but not *D. simulans*? A simple explanation is that  
532 motifs are responsible for variation in recombination rate on a local scale. Hence, the lower  
533 density in *D. simulans*, results also in less micro-scale variation in recombination rate.  
534 Alternatively, this pattern could be explained if the recombination motifs are recognised  
535 directly by cleavage proteins, similar to PRDM9, that differ in function or effectiveness  
536 between *D. simulans* and *D. melanogaster*. Recent evidence shows that a zinc-finger gene and  
537 protein of this type exists in *D. melanogaster* (Hunter, et al. 2016a). Yet, such proteins tend to  
538 bind to complex, rather than short-repeat motifs, making this explanation unlikely. Another  
539 possibility relates to chromatin structure, because short-repeat DNA recombination motifs are  
540 thought to play roles in loosening chromatin structure, increasing access for double-stranded



541 break (DSB) inducing proteins (Adrian, et al. 2016, and references therein; Comeron, et al.  
542 2012). This could account for micro-variation in recombination rates genome-wide between  
543 species, for instance because the motifs were generally shorter and so presumably less  
544 effective at chromatin loosening in *D. simulans*, genome-wide. Circumstantial evidence in  
545 favour of this hypothesis includes that in both species motif correlation patterns varied cross  
546 chromosomes – for instance, C4 was a good predictor only on X – suggesting that motifs can  
547 operate in a context dependent manner. Likewise, the removal of subcentromeric and  
548 subtelomeric region recombination data has been found not to alter correlational patterns in  
549 *D. melanogaster* (Adrian, et al. 2016), suggesting that if motifs densities explain some  
550 recombination rate genome wide, they cannot explain centromeric and telomeric differences.

551

552 In short, we present the hypothesis that while short-repeat DNA motifs may affect  
553 recombination at a micro-scale, genome-wide, for instance in relation to euchromatic  
554 structure context, they cannot explain the large differences in recombination landscape  
555 differences between species, especially in the centromeric and telomeric regions. This  
556 variation seems far more likely to be explained by a mechanism such as *mei-217/mei-218*.

557

558

## 559 **SUPPLEMENTARY MATERIAL**

560 Supplementary Figures 1-2, and supplements 3-5 are available at [insert location here]. All  
561 data generated and used in this study are available (see Data Accessibility below for details).

562

## 563 **DATA ACCESSIBILITY**

564 Raw sequence reads for the 189 isofemale line haplotypes are available to download at the  
565 European Nucleotide Archive (ENA) under the accession numbers: [[added on acceptance]].

566 Phased haplotypes are available from Dryad via accession numbers: [[added on acceptance]].

567 Finally, CSV files for the *D. simulans* recombination map, at each resolution, are available for

568 download from Dryad via accession numbers [[added on acceptance]].

569

## 570 **ACKNOWLEDGMENTS**

571 The authors thank all members of the Institute of Population Genetics for discussion and

572 support on this project. This work was supported by the European Research Council (ERC)

573 grant “ArchAdapt” to CS, an Austrian Academy of Sciences DOC fellowship to TT, and the

574 Austrian Science Fund (FWF, W1225).

575

## 576 **AUTHOR CONTRIBUTIONS**

577 RM, JMH and CS conceived the study and interpreted the results. TT produced the

578 recombination map. VN generated the NGS libraries. RM performed the analysis, with input

579 from JMH. JMH and C.S. wrote the manuscript with input from all authors.

580

## 581 **REFERENCES**

582 Adrian AB, Corchado JC, Comeron JM 2016. Predictive models of recombination rate

583 Variation across the *Drosophila melanogaster* genome. *Genome Biol Evol* 8: 2597-2612. doi:

584 10.1093/gbe/evw181

585 Aquadro CF, Bauer DuMont V, Reed FA 2001. Genome-wide variation in the human and

586 fruitfly: a comparison. *Curr Opin Genet Dev* 11: 627-634.

587 Aquadro CF, Begun DJ, Kindahl EC. 1994. Selection, Recombination, and DNA

588 Polymorphism in *Drosophila*. In. *Non-neutral evolution*: Springer. p. 46-56.

589 Bailey TL, et al. 2009. MEME SUITE: tools for motif discovery and searching. *Nucleic Acids*

590 Res 37: W202-208. doi: 10.1093/nar/gkp335

- 591 Bailey TL, Elkan C. 1994. Fitting a mixture model by expectation maximization to discover  
592 motifs in biopolymers. Proceedings of the Second International Conference on Intelligent  
593 Systems for Molecular Biolog. Menlo Park, California.
- 594 Bailey TL, Johnson J, Grant CE, Noble WS 2015. The MEME Suite. Nucleic Acids Res 43:  
595 W39-49. doi: 10.1093/nar/gkv416
- 596 Baker CL, Walker M, Kajita S, Petkov PM, Paigen K 2014. PRDM9 binding organizes hotspot  
597 nucleosomes and limits Holliday junction migration. Genome Res 24: 724-732. doi:  
598 10.1101/gr.170167.113
- 599 Baker WK 1958. Crossing over in heterochromatin. Am. Nat. 92: 59-60. doi: 10.1086/282010
- 600 Barghi N, Tobler R, Nolte V, Schlötterer C 2017. *Drosophila simulans*: a species with improved  
601 resolution in evolve and resequence studies. G3 (Bethesda) 7: 2337-2343. doi:  
602 10.1534/g3.117.043349
- 603 Baudat F, et al. 2010. PRDM9 is a major determinant of meiotic recombination hotspots in  
604 humans and mice. Science 327: 836-840.
- 605 Beadle GW 1932. A possible influence of the spindle fibre on crossing-over in *Drosophila*.  
606 Proc Natl Acad Sci U S A 18: 160-165. doi: 10.1073/pnas.18.2.160
- 607 Begun DJ, Aquadro CF 1992. Levels of naturally occurring DNA polymorphism correlate with  
608 recombination rates in *D. melanogaster*. Nature 356: 519-520. doi: 10.1038/356519a0
- 609 Begun DJ, et al. 2007. Population genomics: whole-genome analysis of polymorphism and  
610 divergence in *Drosophila simulans*. PLoS Biol 5: e310. doi: 10.1371/journal.pbio.0050310
- 611 Benjamini Y, Hochberg Y 1995. Controlling the false discovery rate - a practical and powerful  
612 approach to multiple testing. J R Stat Soc Series B Stat Methodol 57: 289-300.
- 613 Bergerat A, et al. 1997. An atypical topoisomerase II from Archaea with implications for  
614 meiotic recombination. Nature 386: 414-417. doi: 10.1038/386414a0

615 Billings T, et al. 2013. DNA binding specificities of the long zinc-finger recombination protein  
616 PRDM9. *Genome Biol.* 14: R35. doi: 10.1186/gb-2013-14-4-r35

617 Brand CL, Cattani MV, Kingan SB, Landeen EL, Presgraves DC 2018. Molecular evolution at  
618 a meiosis gene mediates species differences in the rate and patterning of recombination. *Curr*  
619 *Biol* 28: 1289-1295 e1284. doi: 10.1016/j.cub.2018.02.056

620 Brick K, Smagulova F, Khil P, Camerini-Otero RD, Petukhova GV 2012. Genetic  
621 recombination is directed away from functional genomic elements in mice. *Nature* 485: 642-  
622 645. doi: 10.1038/nature11089

623 Broman KW, Murray JC, Sheffield VC, White RL, Weber JL 1998. Comprehensive human  
624 genetic maps: individual and sex-specific variation in recombination. *Am J Hum Genet* 63:  
625 861-869. doi: 10.1086/302011

626 Chan AH, Jenkins PA, Song YS 2012. Genome-wide fine-scale recombination rate variation in  
627 *Drosophila melanogaster*. *PLoS Genet* 8: e1003090. doi: 10.1371/journal.pgen.1003090

628 Charlesworth B, Charlesworth D. 2010. *Elements of Evolutionary Genetics*. Colorado: Roberts  
629 and Company Publishers.

630 Charlesworth B, Lapid A 1992. The distribution of transposable elements within and between  
631 chromosomes in a population of *Drosophila melanogaster*. I. Element frequencies and  
632 distribution. *Genet Res* 60: 103-114.

633 Charlesworth B, Sniegowski P, Stephan W 1994. The evolutionary dynamics of repetitive DNA  
634 in eukaryotes. *Nature* 371: 215-220. doi: 10.1038/371215a0

635 Choi K, Henderson IR 2015. Meiotic recombination hotspots - a comparative view. *Plant J* 83:  
636 52-61. doi: 10.1111/tpj.12870

637 Choulet F, et al. 2014. Structural and functional partitioning of bread wheat chromosome 3B.  
638 *Science* 345: 1249721. doi: 10.1126/science.1249721

- 639 Cirulli ET, Kliman RM, Noor MA 2007. Fine-scale crossover rate heterogeneity in *Drosophila*  
640 *pseudoobscura*. J Mol Evol 64: 129-135. doi: 10.1007/s00239-006-0142-7
- 641 Cleveland WS, Grosse E, Shyu WM. 1992. Local regression models. In: Chambers JM, Hastie  
642 TJ, editors. Statistical Models Wadsworth & Brooks/Cole.
- 643 Comeron JM, Ratnappan R, Bailin S 2012. The many landscapes of recombination in  
644 *Drosophila melanogaster*. PLoS Genet 8: e1002905. doi: 10.1371/journal.pgen.1002905
- 645 Detlefsen JA, Roberts E 1921. Studies on crossing over—I. The effect of selection on crossover  
646 values. J Exp Zool A Ecol Integr Physiol 32: 333–354.
- 647 Fiston-Lavier AS, Singh ND, Lipatov M, Petrov DA 2010. *Drosophila melanogaster*  
648 recombination rate calculator. Gene 463: 18-20. doi: 10.1016/j.gene.2010.04.015
- 649 Garrison E, Marth G 2012. Haplotype-based variant detection from short-read sequencing.  
650 arXiv: 1207.3907.
- 651 Grant CE, Bailey TL, Noble WS 2011. FIMO: scanning for occurrences of a given motif.  
652 Bioinformatics 27: 1017-1018. doi: 10.1093/bioinformatics/btr064
- 653 Grey C, et al. 2011. Mouse PRDM9 DNA-binding specificity determines sites of histone H3  
654 lysine 4 trimethylation for initiation of meiotic recombination. PLoS Biol 9: e1001176. doi:  
655 10.1371/journal.pbio.1001176
- 656 Gupta S, Stamatoyannopoulos JA, Bailey TL, Noble WS 2007. Quantifying similarity between  
657 motifs. Genome Biol. 8: R24. doi: ARTN R24  
658 10.1186/gb-2007-8-2-r24
- 659 Haddrill PR, Halligan DL, Tomaras D, Charlesworth B 2007. Reduced efficacy of selection in  
660 regions of the *Drosophila* genome that lack crossing over. Genome Biol. 8: R18. doi:  
661 10.1186/gb-2007-8-2-r18

662 Heil CS, Noor MA 2012. Zinc finger binding motifs do not explain recombination rate variation  
663 within or between species of *Drosophila*. PLoS One 7: e45055. doi:  
664 10.1371/journal.pone.0045055

665 Hermann P, Heissl A, Tiemann-Boege I, Futschik A 2018. LDJump: Estimating variable  
666 recombination rates from population genetic data. bioRxiv. doi: 10.1101/190876

667 Hey J 2004. What's so hot about recombination hotspots? PLoS Biology 2: e190.

668 Heil CS, Ellison C, Dubin M, Noor MA 2015. Recombining without hotspots: a comprehensive  
669 evolutionary portrait of recombination in two closely related species of *Drosophila*. Genome  
670 Biol Evol 7: 2829-2842.

671 Hill WG, Robertson A 1966. The effect of linkage on limits to artificial selection. Genet Res 8:  
672 269-294.

673 Hughes SE, Miller DE, Miller AL, Hawley RS 2018. Female meiosis: snapsis, recombination,  
674 and segregation in *Drosophila melanogaster*. Genetics 208: 875-908.

675 Hunter CM, Huang W, Mackay TF, Singh ND 2016a. The genetic architecture of natural  
676 variation in recombination rate in *Drosophila melanogaster*. PLoS Genet 12: e1005951. doi:  
677 10.1371/journal.pgen.1005951

678 Hunter CM, Robinson MC, Aylor DL, Singh ND 2016b. Genetic background, maternal age,  
679 and interaction effects mediate rates of crossing over in *Drosophila melanogaster* females. G3  
680 (Bethesda) 6: 1409-1416. doi: 10.1534/g3.116.027631

681 International HapMap Consortium 2007. A second generation human haplotype map of over  
682 3.1 million SNPs. Nature 449: 851.

683 Jeffreys AJ, Kauppi L, Neumann R 2001. Intensely punctate meiotic recombination in the class  
684 II region of the major histocompatibility complex. Nat Genet 29: 217-222. doi:  
685 10.1038/ng1001-217

686 John B. 2005. Meiosis. New York: Cambridge University Press.

- 687 Kauer M, Zangerl B, Dieringer D, Schlötterer C 2002. Chromosomal patterns of microsatellite  
688 variability contrast sharply in African and non-African populations of *Drosophila*  
689 *melanogaster*. *Genetics* 160: 247-256.
- 690 Keeney S 2001. Mechanism and control of meiotic recombination initiation. *Curr Top Dev Biol*  
691 52: 1-53.
- 692 Keeney S, Giroux CN, Kleckner N 1997. Meiosis-specific DNA double-strand breaks are  
693 catalyzed by Spo11, a member of a widely conserved protein family. *Cell* 88: 375-384.
- 694 Kofler R, Betancourt AJ, Schlötterer C 2012. Sequencing of pooled DNA samples (Pool-Seq)  
695 uncovers complex dynamics of transposable element insertions in *Drosophila melanogaster*.  
696 *PLoS Genet* 8: e1002487. doi: 10.1371/journal.pgen.1002487
- 697 Kofler R, Schlötterer C 2014. A guide for the design of evolve and resequencing studies. *Mol*  
698 *Biol Evol* 31: 474-483. doi: 10.1093/molbev/mst221
- 699 Kohl KP, Singh ND 2018. Experimental evolution across different thermal regimes yields  
700 genetic divergence in recombination fraction but no divergence in temperature associated  
701 plastic recombination. *Evolution* 72: 989-999. doi: 10.1111/evo.13454
- 702 Kulathinal RJ, Bennett SM, Fitzpatrick CL, Noor MA 2008. Fine-scale mapping of  
703 recombination rate in *Drosophila* refines its correlation to diversity and divergence. *Proc Natl*  
704 *Acad Sci U S A* 105: 10051-10056. doi: 10.1073/pnas.0801848105
- 705 Lam I, Keeney S 2014. Mechanism and regulation of meiotic recombination initiation. *Cold*  
706 *Spring Harb Perspect Biol* 7: a016634. doi: 10.1101/cshperspect.a016634
- 707 Lichten M, Goldman AS 1995. Meiotic recombination hotspots. *Annu Rev Genet* 29: 423-444.  
708 doi: 10.1146/annurev.ge.29.120195.002231
- 709 Manzano-Winkler B, McGaugh SE, Noor MA 2013. How hot are *Drosophila* hotspots?  
710 Examining recombination rate variation and associations with nucleotide diversity, divergence,  
711 and maternal age in *Drosophila pseudoobscura*. *PLoS One* 8: e71582.

- 712 Mihola O, Trachtulec Z, Vlcek C, Schimenti JC, Forejt J 2009. A mouse speciation gene  
713 encodes a meiotic histone H3 methyltransferase. *Science* 323: 373-375. doi:  
714 10.1126/science.1163601
- 715 Miller DE, et al. 2016. Whole-genome analysis of individual meiotic events in *Drosophila*  
716 *melanogaster* reveals that noncrossover gene conversions are insensitive to interference and the  
717 centromere effect. *Genetics* 203: 159-171. doi: 10.1534/genetics.115.186486
- 718 Miller DE, et al. 2012. A whole-chromosome analysis of meiotic recombination in *Drosophila*  
719 *melanogaster*. *G3 (Bethesda)* 2: 249-260. doi: 10.1534/g3.111.001396
- 720 Myers S, Bottolo L, Freeman C, McVean G, Donnelly P 2005. A fine-scale map of  
721 recombination rates and hotspots across the human genome. *Science* 310: 321-324. doi:  
722 10.1126/science.1117196
- 723 Myers S, et al. 2010. Drive against hotspot motifs in primates implicates the PRDM9 gene in  
724 meiotic recombination. *Science* 327: 876-879. doi: 10.1126/science.1182363
- 725 Nachman MW 2002. Variation in recombination rate across the genome: evidence and  
726 implications. *Curr Opin Genet Dev* 12: 657-663.
- 727 Neel JV 1941. A relation between larval nutrition and the frequency of crossing over in the  
728 third chromosome of *Drosophila melanogaster*. *Genetics* 26: 506-516.
- 729 Ohnishi S, Voelker RA 1981. Comparative studies of allozyme loci in *Drosophila simulans* and  
730 *Drosophila melanogaster*. I. Three dipeptidase loci. *Biochem Genet* 19: 75-85.
- 731 Ohnishi S, Voelker RA 1979. Comparative studies of allozyme loci in *Drosophila-simulans*  
732 and *D-melanogaster* .2. Gene arrangement on the 3rd chromosome. *Jpn J Genet* 54: 203-209.  
733 doi: DOI 10.1266/jjg.54.203
- 734 Palmieri N, Nolte V, Chen J, Schlötterer C 2015. Genome assembly and annotation of a  
735 *Drosophila simulans* strain from Madagascar. *Mol Ecol Resour* 15: 372-381. doi:  
736 10.1111/1755-0998.12297



- 737 Parsons PA 1958. Selection for increased recombination in *Drosophila melanogaster*. Am Nat  
738 92: 255-256. doi: Doi 10.1086/282033
- 739 Parvanov ED, Petkov PM, Paigen K 2010. *Prdm9* controls activation of mammalian  
740 recombination hotspots. Science 327: 835. doi: 10.1126/science.1181495
- 741 Petes TD 2001. Meiotic recombination hot spots and cold spots. Nat Rev Genet 2: 360-369.  
742 doi: 10.1038/35072078
- 743 Petrov DA, Fiston-Lavier AS, Lipatov M, Lenkov K, Gonzalez J 2011. Population genomics  
744 of transposable elements in *Drosophila melanogaster*. Mol Biol Evol 28: 1633-1644. doi:  
745 10.1093/molbev/msq337
- 746 Pratto F, et al. 2014. DNA recombination. Recombination initiation maps of individual human  
747 genomes. Science 346: 1256442. doi: 10.1126/science.1256442
- 748 R Core Development Team. 2018. R: A language and environment for statistical computing: R  
749 Foundation for Statistical Computing.
- 750 Redfield H 1966. Delayed mating and the relationship of recombination to maternal age in  
751 *Drosophila melanogaster*. Genetics 53: 593-607.
- 752 Rizzon C, Marais G, Gouy M, Biemont C 2002. Recombination rate and the distribution of  
753 transposable elements in the *Drosophila melanogaster* genome. Genome Res 12: 400-407. doi:  
754 10.1101/gr.210802
- 755 Roberts PA 1965. Difference in the behaviour of eu- and hetero-chromatin: crossing-over.  
756 Nature 205: 725-726.
- 757 Roeder GS 1997. Meiotic chromosomes: it takes two to tango. Genes Dev 11: 2600-2621.
- 758 Schöfl G, Schlötterer C 2004. Patterns of microsatellite variability among X chromosomes and  
759 autosomes indicate a high frequency of beneficial mutations in non-African *D. simulans*. J Mol  
760 Biol Evol 21: 1384-1390.

- 761 Schwacha A, Kleckner N 1995. Identification of double Holliday junctions as intermediates in  
762 meiotic recombination. *Cell* 83: 783-791. doi: 10.1016/0092-8674(95)90191-4
- 763 Singh ND, Aquadro CF, Clark AG 2009. Estimation of fine-scale recombination intensity  
764 variation in the white-echinus interval of *D. melanogaster*. *J Mol Evol* 69: 42-53. doi:  
765 10.1007/s00239-009-9250-5
- 766 Singh ND, Stone EA, Aquadro CF, Clark AG 2013. Fine-scale heterogeneity in crossover rate  
767 in the garnet-scalloped region of the *Drosophila melanogaster* X chromosome. *Genetics* 194:  
768 375-387. doi: 10.1534/genetics.112.146746
- 769 Stapley J, Feulner PGD, Johnston SE, Santure AW, Smadja CM 2017. Variation in  
770 recombination frequency and distribution across eukaryotes: patterns and processes. *Philos*  
771 *Trans R Soc Lond B Biol Sci* 372: 20160455. doi: 10.1098/rstb.2016.0455
- 772 Stern C 1926. An effect of temperature and age on crossing-over in the first chromosome of  
773 *Drosophila melanogaster*. *Proc Natl Acad Sci U S A* 12: 530-532.
- 774 Stevison LS, Noor MA 2010. Genetic and evolutionary correlates of fine-scale recombination  
775 rate variation in *Drosophila persimilis*. *J Mol Evol* 71: 332-345. doi: 10.1007/s00239-010-  
776 9388-1
- 777 Stuktevanat H. 1929. *The Genetics of Drosophila simulans*. Carnegie Institute: Washington  
778 Publishing Company.
- 779 Sturtevant AH, Beadle GW 1936. The relations of inversions in the X chromosome of  
780 *Drosophila melanogaster* to crossing over and cisjunction. *Genetics* 21: 554-604.
- 781 Szauter P 1984. An analysis of regional constraints on exchange in *Drosophila melanogaster*  
782 using recombination-defective meiotic mutants. *Genetics* 106: 45-71.
- 783 Szostak JW, Orr-Weaver TL, Rothstein RJ, Stahl FW 1983. The double-strand-break repair  
784 model for recombination. *Cell* 33: 25-35.

785 Termolino P, Cremona G, Consiglio MF, Conicella C 2016. Insights into epigenetic landscape  
786 of recombination-free regions. *Chromosoma* 125: 301-308. doi: 10.1007/s00412-016-0574-9  
787 Tobler R, et al. 2014. Massive habitat-specific genomic response in *D. melanogaster*  
788 populations during experimental evolution in hot and cold environments. *Mol Biol Evol* 31:  
789 364-375. doi: 10.1093/molbev/mst205  
790 True JR, Mercer JM, Laurie CC 1996. Differences in crossover frequency and distribution  
791 among three sibling species of *Drosophila*. *Genetics* 142: 507-523.

792

### 793 **SI. Legends**

794

795 **Fig. S1.** Linear models predict some of the variance in recombination rate in  
796 *D. melanogaster*, but not in *D. simulans*. Scatterplot of recombination rate vs. motif density  
797 for (a) *D. melanogaster* and (b) *D. simulans* (species also indicated by blue and red colour,  
798 respectively). Gray lines represent single-motif linear model fits, inset numbers the  
799 corresponding  $r^2$  values, and appended asterisks indicate the  $p$ -values of the model fits at \* <  
800 0.05, \*\* < 0.01, \*\*\* < 0.001. For purposes of this comparison only, smoothed *D. simulans*  
801 data at 101k is shown here, with the same resolution of the *D. melanogaster* data. The  
802 recognisable correlation features in (b) are unaffected by this downsampling step (not shown).

803

804 **Fig. S2.** Loess-smoothed recombination maps. Red lines show the recombination rate in  
805 *D. simulans* for each of the major chromosomes (name labels in top margin), smoothed at 4  
806 window sizes (see right margin, in bp) with the LOESS span parameter. LOESS span  
807 parameters correspond to 25, 101, 501, and 2501 kb, as span parameters equivalent to 5 kb  
808 can't be implemented. For comparison, blue lines show the recombination rate in

809 *D. melanogaster* (with data taken from Comeron *et al.* 2012 at 101k; and then smoothed at  
810 501k and 2501k; with data not available at smaller resolutions).  
811  
812 **S3.** MEME motif discovery output for each *Drosophila* species at each genomic resolution.  
813  
814 **S4.** TomTom contrast of motifs from Adrian *et al.* (2016) to our set of 5 consensus motifs.  
815  
816 **S5.** R-Markdown document with script to reproduce our results [on acceptance of the article].
